# Supplementary material for: Development of an organ failure score in acute liver failure for transplant selection and identification of patients at high risk of futility
Source: PubMed Central journal article supplement (PMC5716582; doi:10.1371/journal.pone.0188151), 2017-12-05
Supplement: pone.0188151.s002.pdf [file pone.0188151.s002.pdf]

|                                      | Alive        |                    | Dead         |                    | Univariate       |               |                    | Included in SOFA,<br><br>CLIF-OF or CLIF-ACLF | Multivariate |              |              |                    |
|--------------------------------------|--------------|--------------------|--------------|--------------------|------------------|---------------|--------------------|-----------------------------------------------|--------------|--------------|--------------|--------------------|
|                                      | 38           |                    | 23           |                    | P value.         | HR            | 95% CI             |                                               | p            | B            | HR           | 95% CI             |
| Age (years)                          | 37.9         | ± 11.5             | 42.9         | ± 15.5             | 0.184            | 1.020         | 0.99 - 1.05        | yes                                           |              |              |              |                    |
| Sex (F)                              | 25           | 65.8%              | 12           | 52.2%              | 0.228            | 0.604         | 0.27 - 1.37        | no                                            |              |              |              |                    |
| Grade HE 3-4                         | 26           | 68.4%              | 12           | 52.2%              | 0.221            | 0.599         | 0.26 - 1.36        | yes                                           |              |              |              |                    |
| <b>Vasopressor use</b>               | <b>12</b>    | <b>31.6%</b>       | <b>21</b>    | <b>91.3%</b>       | <b>&lt;0.001</b> | <b>13.322</b> | <b>3.11 - 57.1</b> | yes                                           |              |              |              |                    |
| Renal replacement therapy            | 19           | 50%                | 16           | 69.6%              | 0.211            | 1.764         | 0.73 - 4.29        | yes                                           |              |              |              |                    |
| <b>Mechanical ventilation</b>        | <b>18</b>    | <b>47.4%</b>       | <b>21</b>    | <b>91.3%</b>       | <b>0.005</b>     | <b>8.037</b>  | <b>1.88 - 34.4</b> | yes                                           |              |              |              |                    |
| <b>GCS</b>                           | <b>13</b>    | <b>3-15</b>        | <b>8</b>     | <b>3-15</b>        | <b>0.038</b>     | <b>0.914</b>  | <b>0.84 - 0.99</b> | yes                                           |              |              |              |                    |
| <b>Body temperature (°C)</b>         | <b>37.0</b>  | <b>32.2 - 39.2</b> | <b>35.0</b>  | <b>32.6 - 39.1</b> | <b>0.023</b>     | <b>0.762</b>  | <b>0.60 - 0.96</b> | no                                            | 0.539        | 0.131        | 1.14         | 0.75 - 1.73        |
| <b>Heart rate (bpm)</b>              | <b>105</b>   | <b>32 - 150</b>    | <b>130</b>   | <b>100 - 160</b>   | <b>0.001</b>     | <b>1.041</b>  | <b>1.02 - 1.07</b> | no                                            | 0.050        | 0.023        | 1.023        | 1.00 - 1.05        |
| <b>Mean arterial pressure (mmHg)</b> | <b>72</b>    | <b>± 11.2</b>      | <b>53</b>    | <b>± 11.2</b>      | <b>&lt;0.001</b> | <b>0.928</b>  | <b>0.89 - 0.96</b> | yes                                           |              |              |              |                    |
| Respiratory rate (bpm)               | 20           | 10-46              | 22           | 12-46              | 0.332            | 1.023         | 0.98 - 1.07        | no                                            |              |              |              |                    |
| <b>PaCO2 (kPa)</b>                   | <b>4.32</b>  | <b>± 0.95</b>      | <b>5.01</b>  | <b>± 1.45</b>      | <b>0.017</b>     | <b>1.436</b>  | <b>1.07 - 1.93</b> | yes                                           |              |              |              |                    |
| PaO2 (kPa)                           | 12.97        | 6.3 - 36.5         | 14.57        | 14.6 - 48.7        | 0.133            | 1.047         | 0.99 - 1.11        | yes                                           |              |              |              |                    |
| <b>FiO2 (%)</b>                      | <b>28</b>    | <b>21 - 100</b>    | <b>40</b>    | <b>28 - 100</b>    | <b>0.002</b>     | <b>1.023</b>  | <b>1.00 - 1.04</b> | yes                                           |              |              |              |                    |
| PaO2/FiO2 (kPa)                      | 53           | ± 19.6             | 34           | ± 24.1             | 0.070            | 0.98          | 0.96 - 1.00        | yes                                           |              |              |              |                    |
| <b>A-a Gradient (mmHg)</b>           | <b>39.55</b> | <b>-581</b>        | <b>157.3</b> | <b>-642</b>        | <b>0.008</b>     | <b>1.003</b>  | <b>1.00 - 1.01</b> | no                                            | 0.765        | -0.001       | 0.999        | 0.99 - 1.00        |
| <b>Norepinephrine dose (mcg/min)</b> | <b>0.00</b>  | <b>0 - 37</b>      | <b>21.33</b> | <b>0 - 130</b>     | <b>&lt;0.001</b> | <b>1.038</b>  | <b>1.03 - 1.05</b> | no                                            | <b>0.012</b> | <b>0.020</b> | <b>1.021</b> | <b>1.00 - 1.04</b> |
| Ammonia (umol/L)                     | 82           | ± 49.8             | 119          | ± 61.6             | 0.219            | 1.009         | 0.99 - 1.02        | no                                            |              |              |              |                    |
| White blood cells (10^9/L)           | 9.3          | ± 6.2              | 10.5         | ± 6.8              | 0.388            | 1.028         | 0.97 - 1.09        | yes                                           |              |              |              |                    |
| <b>Platelets (10^9/L)</b>            | <b>109</b>   | <b>± 65.8</b>      | <b>48</b>    | <b>± 53.0</b>      | <b>0.019</b>     | <b>0.99</b>   | <b>0.98 - 0.99</b> | yes                                           |              |              |              |                    |
| Hematocrit (L/L)                     | 0.284        | ± 0.06             | 0.261        | ± 0.07             | 0.201            | 0.011         | 0.00 - 11.1        | no                                            |              |              |              |                    |
| Creatinine (umol/L)                  | 157          | 43 - 825           | 204          | 85 - 663           | 0.809            | 1             | 0.99 - 1.00        | yes                                           |              |              |              |                    |
| Urea (mmol/L)                        | 8            | 1.9 - 46.9         | 7.3          | 3.7 - 28.2         | 0.744            | 0.991         | 0.94 - 1.04        | yes                                           |              |              |              |                    |
| Total Bilirubin (umol/L)             | 70           | 3 - 581            | 93           | 16 - 414           | 0.812            | 1             | 0.99 - 1.00        | yes                                           |              |              |              |                    |
| <b>Albumin (g/L)</b>                 | <b>28</b>    | <b>± 6.17</b>      | <b>21</b>    | <b>± 4.66</b>      | <b>&lt;0.001</b> | <b>0.885</b>  | <b>0.83 - 0.94</b> | no                                            | 0.851        | -0.008       | 0.992        | 0.91 - 1.08        |
| C reactive protein (mg/L)            | 10.5         | 1-67               | 6            | 1 - 102            | 0.936            | 0.999         | 0.97 - 1.02        | no                                            |              |              |              |                    |
| <b>INR</b>                           | <b>5.7</b>   | <b>1.2 - 8</b>     | <b>8</b>     | <b>1.8 - 15</b>    | <b>0.001</b>     | <b>1.316</b>  | <b>1.11 - 1.55</b> | yes                                           |              |              |              |                    |
| <b>APTT (sec)</b>                    | <b>43</b>    | <b>27 - 101</b>    | <b>80</b>    | <b>30 - 250</b>    | <b>&lt;0.001</b> | <b>1.015</b>  | <b>1.01 - 1.02</b> | no                                            | 0.963        | 0            | 1            | 0.99 - 1.02        |
| <b>pH</b>                            | <b>7.387</b> | <b>± 0.96</b>      | <b>7.270</b> | <b>± 0.15</b>      | <b>&lt;0.001</b> | <b>0.001</b>  | <b>0.00 - 0.03</b> | no                                            | 0.505        | -1.576       | 0.207        | 0.00 - 21.2        |
| Sodium (mmol/L)                      | 131          | ± 7.18             | 126          | ± 9.38             | 0.280            | 0.972         | 0.92 - 1.02        | no                                            |              |              |              |                    |
| <b>Potassium (mmol/L)</b>            | <b>3.4</b>   | <b>2.3 - 5.2</b>   | <b>3.6</b>   | <b>3.0 - 5.6</b>   | <b>0.015</b>     | <b>2.408</b>  | <b>1.18 - 4.90</b> | no                                            | 0.328        | -0.48        | 0.619        | 0.24 - 1.62        |
| HCO3 (mmol/L)                        | 20.3         | ± 4.81             | 18.0         | ± 5.11             | 0.064            | 0.921         | 0.85 - 1.01        | no                                            |              |              |              |                    |
| <b>BE (mmol/L)</b>                   | <b>-3</b>    | <b>± 5.86</b>      | <b>-9.2</b>  | <b>± 6.64</b>      | <b>0.004</b>     | <b>0.91</b>   | <b>0.85 - 0.97</b> | no                                            | 0.268        | -0.049       | 0.952        | 0.87 - 1.04        |
| <b>Lactate (mmol/L)</b>              | <b>3.8</b>   | <b>0.8 - 14.6</b>  | <b>8.8</b>   | <b>2.6 - 20.3</b>  | <b>&lt;0.001</b> | <b>1.175</b>  | <b>1.09 - 1.26</b> | no                                            | 0.620        | -0.037       | 0.963        | 0.83 - 1.12        |
| <b>SOFA</b>                          | <b>8.5</b>   | <b>± 3.55</b>      | <b>13.5</b>  | <b>± 3.01</b>      | <b>&lt;0.001</b> | <b>1.313</b>  | <b>1.17 - 1.48</b> | -                                             | 0.762        | -0.045       | 0.956        | 0.71 - 1.28        |
| <b>CLIF-C OF</b>                     | <b>11.5</b>  | <b>9-16</b>        | <b>15</b>    | <b>12-16</b>       | <b>&lt;0.001</b> | <b>1.705</b>  | <b>1.31 - 2.22</b> | -                                             | <b>0.014</b> | <b>0.391</b> | <b>1.478</b> | <b>1.08 - 2.02</b> |
| <b>CLIF-C ACLF</b>                   | <b>45.3</b>  | <b>± 14.3</b>      | <b>58.7</b>  | <b>± 9.3</b>       | <b>&lt;0.001</b> | <b>1.079</b>  | <b>1.03 - 1.13</b> | -                                             | 0.248        | -0.035       | 0.965        | 0.91 - 1.03        |
